# Supplementary material for: Dieckol Decreases Caloric Intake and Attenuates Nonalcoholic Fatty Liver Disease and Hepatic Lymphatic Vessel Dysfunction in High-Fat-Diet-Fed Mice
Source: MDPI journal article supplement (doi:10.3390/md19090495), 2021-08-30
Supplement: s1 [file s1]

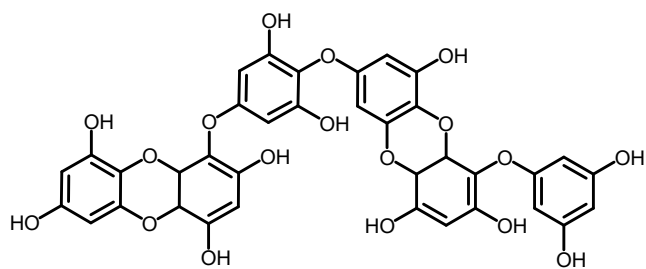

Dieckol (DK)

Figure S1. The chemical structure of compound dieckol (DK) from *Ecklonia cava*.

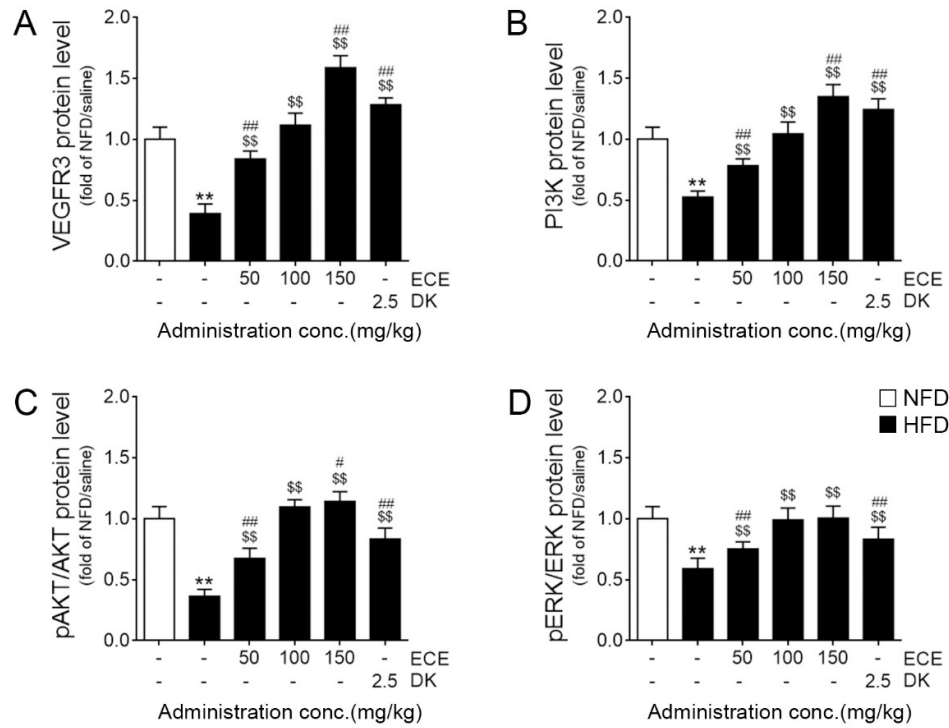

**Figure S2. Regulatory effects of ECE and DK on the VEGFR3 pathway in the liver tissue of HFD-fed mice.** (A–D) The levels of VEGFR3 (A), PI3K (B), pAKT/AKT (C), and pERK/ERK (D) in the liver were decreased by HFD/saline and increased after treatment with ECE or DK. The graph of the immunoblotting was quantified in liver tissue. Data are mean  $\pm$  SD. \*\*,  $p < 0.01$  vs. NFD/saline; \$\$,  $p < 0.01$ , vs. HFD/saline; #,  $p < 0.05$  and ##,  $p < 0.01$  vs. HFD/ECE100 (Mann-Whitney U test). DK, dieckol; ECE, *Ecklonia cava* extract; HFD, high-fat diet; NFD, normal fat diet; PI3K, phosphoinositide 3-kinases; pAKT, phosphorylated protein kinase B; pERK1/2, phosphorylated extracellular signal-regulated kinases1/2; VEGFR3, vascular endothelial growth factor receptor 3.

**Table S1. List of primers for qRT-PCR**

| Gene                           |         | Primers                      |
|--------------------------------|---------|------------------------------|
| <i>Actb</i>                    | Forward | 5'-CCGTAAAGACCTCTATGCCAAC-3' |
|                                | Reverse | 5'-GCAGTAATCTCCTTCTGCATCC-3' |
| <i>IL-6</i>                    | Forward | 5'-TCCGGAGAGGAGACTTCACA-3'   |
|                                | Reverse | 5'-CATAACGCACTAGGTTTGCCG-3'  |
| <i>TNF-<math>\alpha</math></i> | Forward | 5'-TGTCTACTCCTCAGAGCCCC -3'  |
|                                | Reverse | 5'-GACCCGTAGGGCGATTACAG-3'   |

**Table S2. List of antibodies for staining (immunohistochemistry and immunofluorescence) and western blotting**

| Antigen        | Host   | Company                  | Catalog no. | Dilution rate |                  |
|----------------|--------|--------------------------|-------------|---------------|------------------|
|                |        |                          |             | staining      | Western blotting |
| CD86           | Mouse  | Santa cruz biotechnology | sc-19617    | 1:100         | -                |
| CD206          | Mouse  | Santa cruz biotechnology | sc-58987    | 1:100         | -                |
| VEGFC          | Rabbit | Invitrogen               | PA5-29772   | 1:100         | -                |
| VEGFR3         | Mouse  | Santa cruz biotechnology | sc-514825   | 1:100         | 1:100            |
| PI3K           | Mouse  | Santa cruz biotechnology | sc-376112   | 1:50          | 1:500            |
| AKT            | Mouse  | BD                       | BD610860    | -             | 1:500            |
| pAKT           | Mouse  | Santa cruz biotechnology | sc-514032   | 1:50          | -                |
| pAKT           | Rabbit | Cell signaling           | 4060        | -             | 1:1000           |
| ERK1/2         | Rabbit | Cell signaling           | 9102        | -             | 1:1000           |
| pERK1/2        | Rabbit | Invitrogen               | PA5-37824   | 1:100         | 1:500            |
| $\beta$ -actin | Rabbit | Cell signaling           | 4967        | -             | 1:500            |
| LYVE-1         | Rabbit | LSBio                    | LS-B10511   | 1:100         | -                |
| VE-cadherin    | goat   | Santa cruz biotechnology | sc-6458     | 1:100         | -                |
